# Supplementary material for: PDGF Receptor Alpha Signaling Is Key for Müller Cell Homeostasis Functions
Source: MDPI journal article supplement (doi:10.3390/ijms22031174), 2021-01-25
Supplement: s1 [file s1]

**Supplementary Materials:**

| <b>Supplementary Table 1. Information on primary and secondary antibodies</b> |                    |                 |                                                           |                      |
|-------------------------------------------------------------------------------|--------------------|-----------------|-----------------------------------------------------------|----------------------|
| <b>Primary antibodies</b>                                                     | <b>Host</b>        | <b>Dilution</b> | <b>Source</b>                                             | <b>Catalogue no.</b> |
| AQP4                                                                          | Rabbit             | 1:500           | Sigma                                                     | A5971                |
| $\beta$ -catenin                                                              | Rabbit             | 1:100           | Cell Signaling                                            | 8480                 |
| CD31                                                                          | Rat                | 1:200           | BD Biosciences                                            | 550274               |
| Calretinin                                                                    | Goat               | 1:300           | Swant                                                     | CG1                  |
| Cone-Arrestin                                                                 | Rabbit             | 1:500           | Merck                                                     | AB15282              |
| GFAP                                                                          | Mouse              | 1:500           | Sigma                                                     | G3893                |
| Glutamine Synthetase (Glul)                                                   | Mouse              | 1:500           | Millipore                                                 | MAB302               |
| Iba1                                                                          | Rabbit             | 1:500           | Wako                                                      | 019-19741            |
| Kir4.1                                                                        | Rabbit             | 1:400           | Alomone labs                                              | APC-035              |
| PDE6b                                                                         | Rabbit             | 1:2000          | Thermofisher                                              | PAI-722              |
| PDGFR $\alpha$                                                                | Rabbit             | 1:200           | Cell Signaling                                            | 3164                 |
| PDGFR $\beta$                                                                 | Goat               | 1:200           | R&D                                                       | AF1042               |
| PKC $\alpha$                                                                  | Mouse              | 1:500           | Santa Cruz                                                | SC166350             |
| SCGN                                                                          | Rabbit             | 1:5000          | Gift from Dr Ludwig Wagner, University of Vienna, Austria |                      |
| <b>Secondary antibodies</b>                                                   |                    |                 |                                                           |                      |
| Alexa-Fluor 488                                                               | Donkey anti-rat    | 1:1000          | LifeTech                                                  | A21208               |
| Alexa-Fluor 647                                                               | Donkey anti-goat   | 1:1000          | Dianova                                                   | 705-605-003          |
| Alexa-Fluor 555                                                               | Donkey anti-rabbit | 1:1000          | Invitrogen                                                | A-31572              |
| Alexa-Fluor 647                                                               | Goat anti-mouse    | 1:1000          | Dianova                                                   | 115-607-072          |
| Cy3                                                                           | Goat anti-rabbit   | 1:1000          | Dianova                                                   | 111-165-144          |
| Cy5                                                                           | Donkey anti-rabbit | 1:1000          | Dianova                                                   | 711-175-152          |
| Isolectin B4 FITC Conjugate                                                   |                    | 1:100           | Sigma                                                     | L289                 |

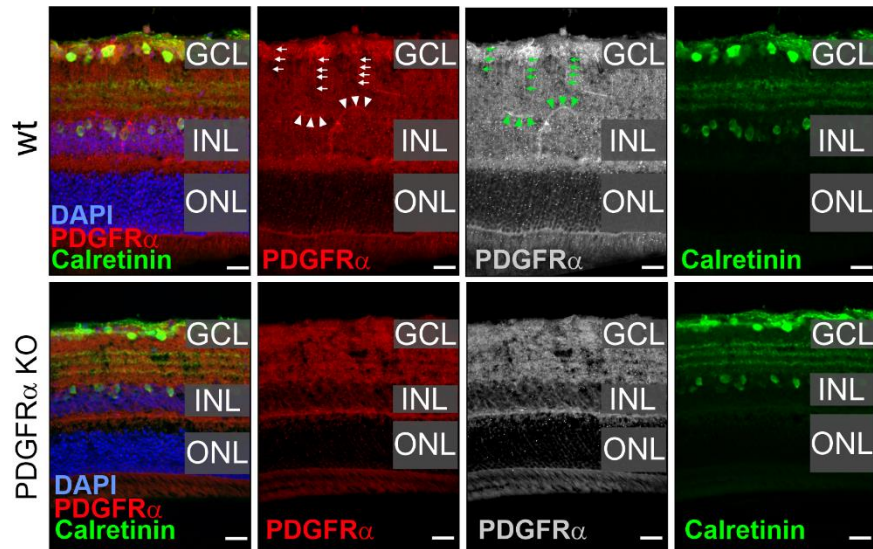

**Figure S1. Evaluation of PDGFR $\alpha$  expression in retinal sections of Müller cell-specific PDGFR $\alpha$  KO mice.** Retinae from wildtype (wt) and PDGFR $\alpha$  KO mice, were cross-sectioned and stained with antibodies for PDGFR $\alpha$  and calretinin (ganglion and amacrine cells). Vessels (arrow heads) and Müller glia (arrows) are immunoreactive for PDGFR $\alpha$ . Note the contrast in level of expression of PDGFR $\alpha$  in putative Müller cell processes in the wt retina in comparison with that in PDGFR $\alpha$  KO mice. Scale bars, 20  $\mu$ m.

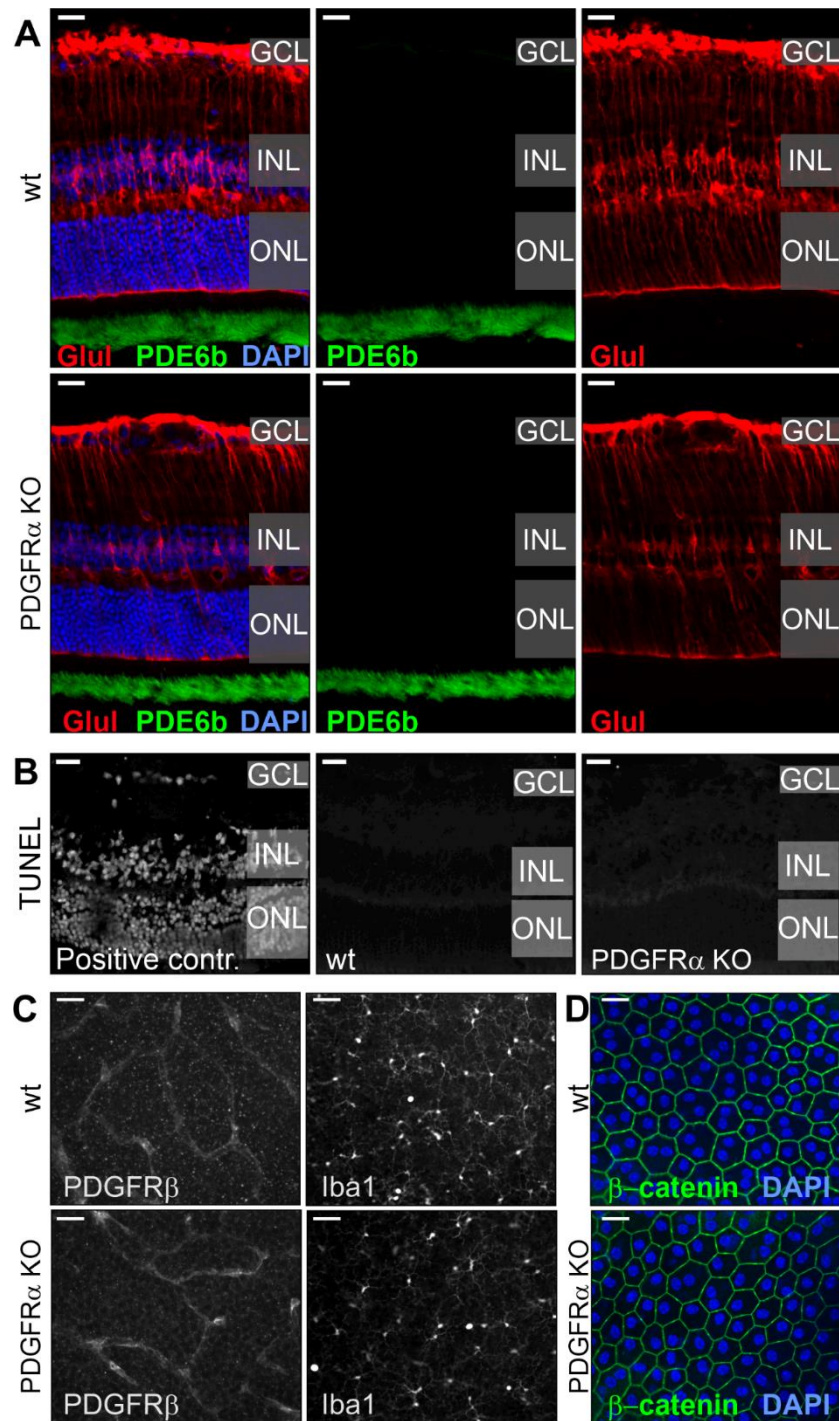

**Figure S2. Immunoreactivity of additional cell markers in Müller cell-specific PDGFR $\alpha$  retinæ.**

(A) Slices from wildtype (wt) and PDGFR $\alpha$  KO eyes were immunostained for the Müller glia marker glutamine synthetase (Glul) and PDE6b, a marker for rod outer segments. The intensity of labeling of Müller glia and rods showed a similar pattern between the both genotypes. (B) TUNEL staining was performed to identify cells that may undergo cell death via the apoptosis pathway upon ablation of PDGFR $\alpha$ . While almost every nucleus in the three nuclear layers of the retina were positive as a result of DNase pretreatment (positive contr.), no TUNEL-positive nuclei were found in wildtype or PDGFR $\alpha$  KO retinæ. (C) Retinæ were flatmounted and labeled using a pericyte (PDGFR $\beta$ ) and a microglia-macrophage marker (Iba1). No major changes in pericytes and microglia were observed in the PDGFR $\alpha$  KO mice in comparison to wildtypes controls. (D) Flatmounted RPE-choroid from wt and PDGFR $\alpha$  KO eyes were labeled for  $\beta$ -catenin, to analyze retinal pigment epithelium (RPE) integrity. No major changes were observed between the two genotypes. Scale bars, 20  $\mu$ m.
